# Supplementary material
Source: publisher site journal article supplement (https://www.spandidos-publications.com/574/downloadSupplementary)

Figure S1. Expression levels of ELOVL6 in HCC tissues from Guichard Liver 2 Data. The expression level of ELOVL6 in HCC tissues compared with normal liver tissues in Guichard Liver 2 Data from the Oncomine Database. The data showed that ELOVL6 expression levels were lower in the HCC tissues compared with normal liver tissues of 377 patients with HCC ( $P < 0.001$ ). ELOVL6, elongation of very long-chain fatty acids family member 6; HCC, hepatocellular carcinoma.

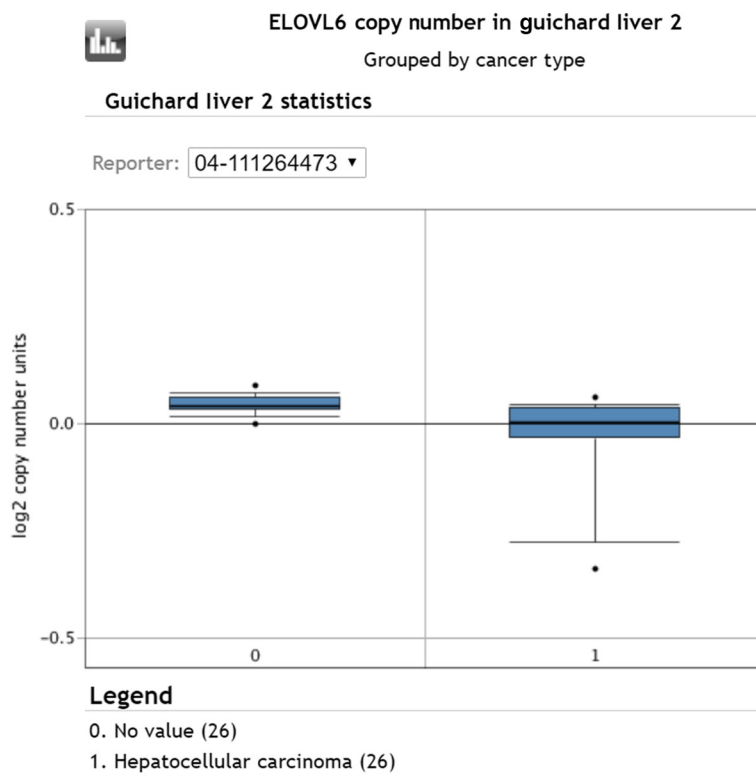

Supplement: Supplementary file 1 [file downloadSupplementary]
